# Supplementary material
Source: Research Square preprint supplement (doi:10.21203/rs.3.rs-7921528/v1)
Supplement: Supplementary file 1 [file ed20c048eec748a63cfb60cb.docx]

Supplementary Information

**Real-time Dual-telescope Normalization for Absorption Muography: an Improved Density Estimation Approach**

**Hamid Basiri1*, Jun Matsushima1, Masashi Kodama1,2, Toshiyuki Yokota2, Mohammed Y. Ali3, Fateh Bouchaala3, Ahmed Eleslambouly3, Hiroyuki K.M. Tanaka4, Eduardo Cortina Gil5, Andrea Giammanco5**

1Department of Environment Systems, Graduate School of Frontier Sciences, The University of Tokyo, Tokyo, Japan.

2Geological Survey of Japan, National Institute of Advanced Industrial Science and Technology (AIST), Japan.

3Department of Earth Sciences, Khalifa University of Science and Technology, Abu Dhabi, United Arab Emirates.

4Earthquake Research Institute, The University of Tokyo, Tokyo, Japan.

5Centre for Cosmology, Particle Physics and Phenomenology, Université catholique de Louvain (UCLouvain), Chemin du Cyclotron 2, Louvain-la-Neuve, B-1348, Belgium.

** Corresponding author*

*Email:**Basiri.hamid@edu.k.u-tokyo.ac.jp;*

Supplementary Figure 1 shows a detector unit, and Table 1 summarizes key features of the detector components.


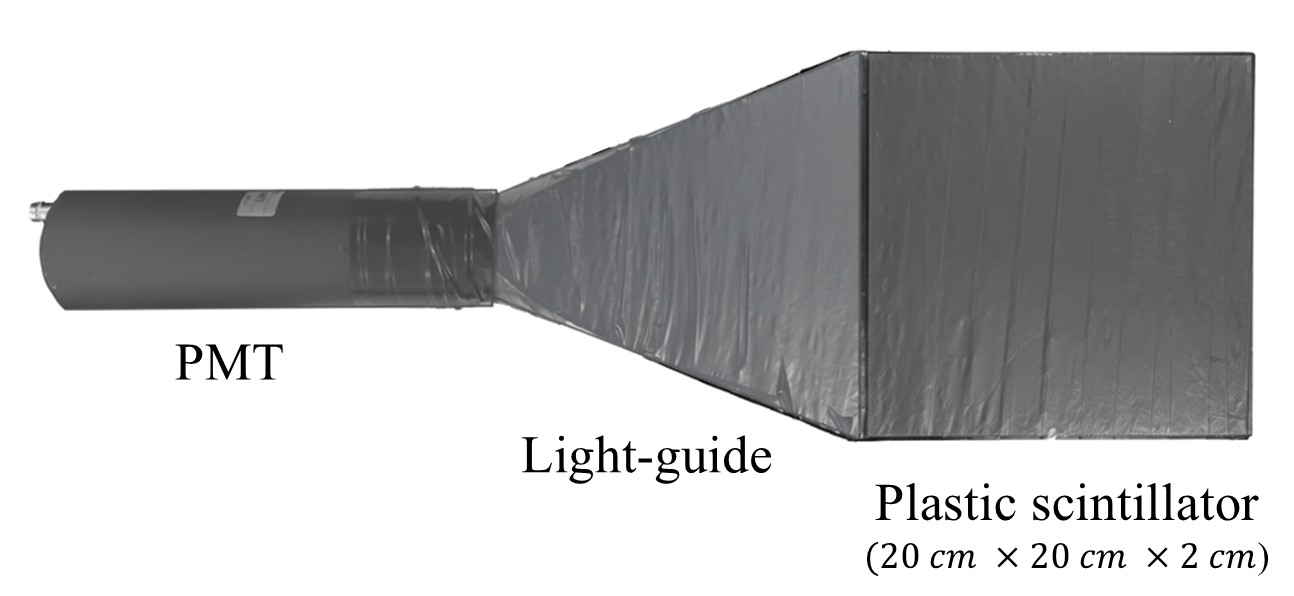


**Supplementary Figure 1 | PMT-scintillator detector configuration.** A photograph of thedetection unit consisting of a 20 cm × 20 cm × 2 cm polystyrene scintillator tile optically coupled through a PMMA light guide to a Hamamatsu H6410 photomultiplier tube (PMT) with peak sensitivity near 420 nm. This assembly constitutes a single detection channel within each of the three-plane coincidence telescopes employed in the experiments.

**Supplementary Table 1** **| Key parameters of detector components**.

| **Component** | **Parameter** | **Value** |
| --- | --- | --- |
| Plastic scintillator tile | Active volume | 20 cm × 20 cm × 2 cm |
|  | Emission peak | ∼ 420 nm |
|  | Light attenuation length | ∼ 90 to 110 cm |
|  | Density | ∼ 1*.*04 gcm−3 |
| PMMA light guide | Refractive index | ∼ 1*.*49 |
|  | Total transmittance | ∼ 93% |
|  | Specific gravity | ∼ 1*.*19 gcm−3 |
| PMT assembly (Hamamatsu H6410) | Spectral response | 300 to 650 nm |
|  | Peak wavelength | 420 nm |
|  | Gain (typ.) | 3*.*0 × 106 |
|  | Transit time spread (typ.) | ∼ 1*.*1 ns |
|  | Rise time (typ.) | ∼ 2*.*7 ns |
|  | Operating HV (anode to cathode) | about −2000 V |

**MIP selection by a robust valley method:**

Cosmic–ray muons traversing plastic scintillators produce a Landau–like pulse–height spectrum with a most–probable, minimum–ionizing peak (MIP) and a long right tail. To select MIPs in each channel and data set (background, acrylic, blind targets), we apply a robust, data–driven valley region of interest (ROI). The method is noise–resistant yet precise, and we verified its reproducibility across runs. The procedure mirrors our analysis code:

1. **Build histograms:** For each channel, form the pulse–height (ADC) histogram with 1-ADC bins on 0*...*1024.
2. **Savitzky–Golay (SG) smoothing:** We apply a SG smoothing step to the binned counts to aid in locating the primary peak and its left and right boundaries. This is applied with scipy.signal.savgol filter using window *w* = 21 (odd) and polynomial order *p* = 3, with edge mode ’interp’. We validate *p*+2 ≤ *w* ≤ *N* −1 (rounding *w* to the nearest valid odd if needed). The SG curve is used only to locate the peak and the left/right boundaries; all event counting uses the raw histogram. These settings (*w* = 21*, p* = 3) were chosen to minimize peak-location jitter across runs and are stable for *w* ∈ [17*,* 25].
3. **Constrain the search ROI:** To avoid the low-ADC pedestal and spurious structures, restrict the MIP search to ADC ∈ [170*,*360] (empirically determined from detector response). The upper bound excludes the Landau tail, which is dominated by rare *δ*-ray–producing collisions and adds variance and geometry/angle-dependent bias.
4. **Initial peak on the smoothed spectrum:** Within the ROI, take the maximum of the SG-smoothed curve to obtain a noise-robust first peak index *i*0.
5. **Refine on the raw data:** Search the raw histogram in a ±25-bin window around *i*0 and take the absolute maximum. This refined index is the MIP peak.
6. **Valley/boundary search on the smoothed spectrum:** Compute left/right boundaries on the SG curve starting from the refined peak:
   - Left boundary ADCleft: nearest local minimum to the left (then expand by a small safety margin).
   - Right boundary ADCright: because the Landau tail is often monotonic, a right minimum may not exist. Choose the *latter* of (i) the first right local minimum (if present) and (ii) the fractional-threshold crossing

*b* + *α* (peak − *b*)*, α* = 0*.*12*,*

where *b* is a local background estimated from low-quantile statistics in the ROI. Enforce a minimum window width and apply small left/right safety expansions (6 bins each).

1. **Define the MIP window:**

[ADCleft*,* ADCright]

with ADCleft from the left minimum and ADCright from the latter of the first right minimum or the fractional-threshold crossing.

1. **Apply the window and count events:** Events with ADC inside the window are tagged as MIPs. From hourly counts per channel and sums over three channels to obtain counts per hour (CPH).
2. **Uncertainties and rationale for the high-ADC cut:** Hourly counts are treated as Poisson; later propagation includes calibration contributions.

For thin plastic scintillators, occasional hard collisions yield energetic *δ* rays, producing a long, geometry-dependent high-ADC tail that is not representative of the minimum ionizing loss. Our hybrid rule of left minimum and, on the right, (minimum if present) else a fractional threshold avoids chasing noise minima, deliberately excludes the tail, and yields a stable, geometry-agnostic MIP counter. The same automatic procedure is applied uniformly to all runs. Supplementary Figs. 2 and 3 illustrate the SG and Automated MIP valley–selection workflows.

Supplementary Fig. 4 summarizes the workflow for density estimation using single and dual-telescope approaches.


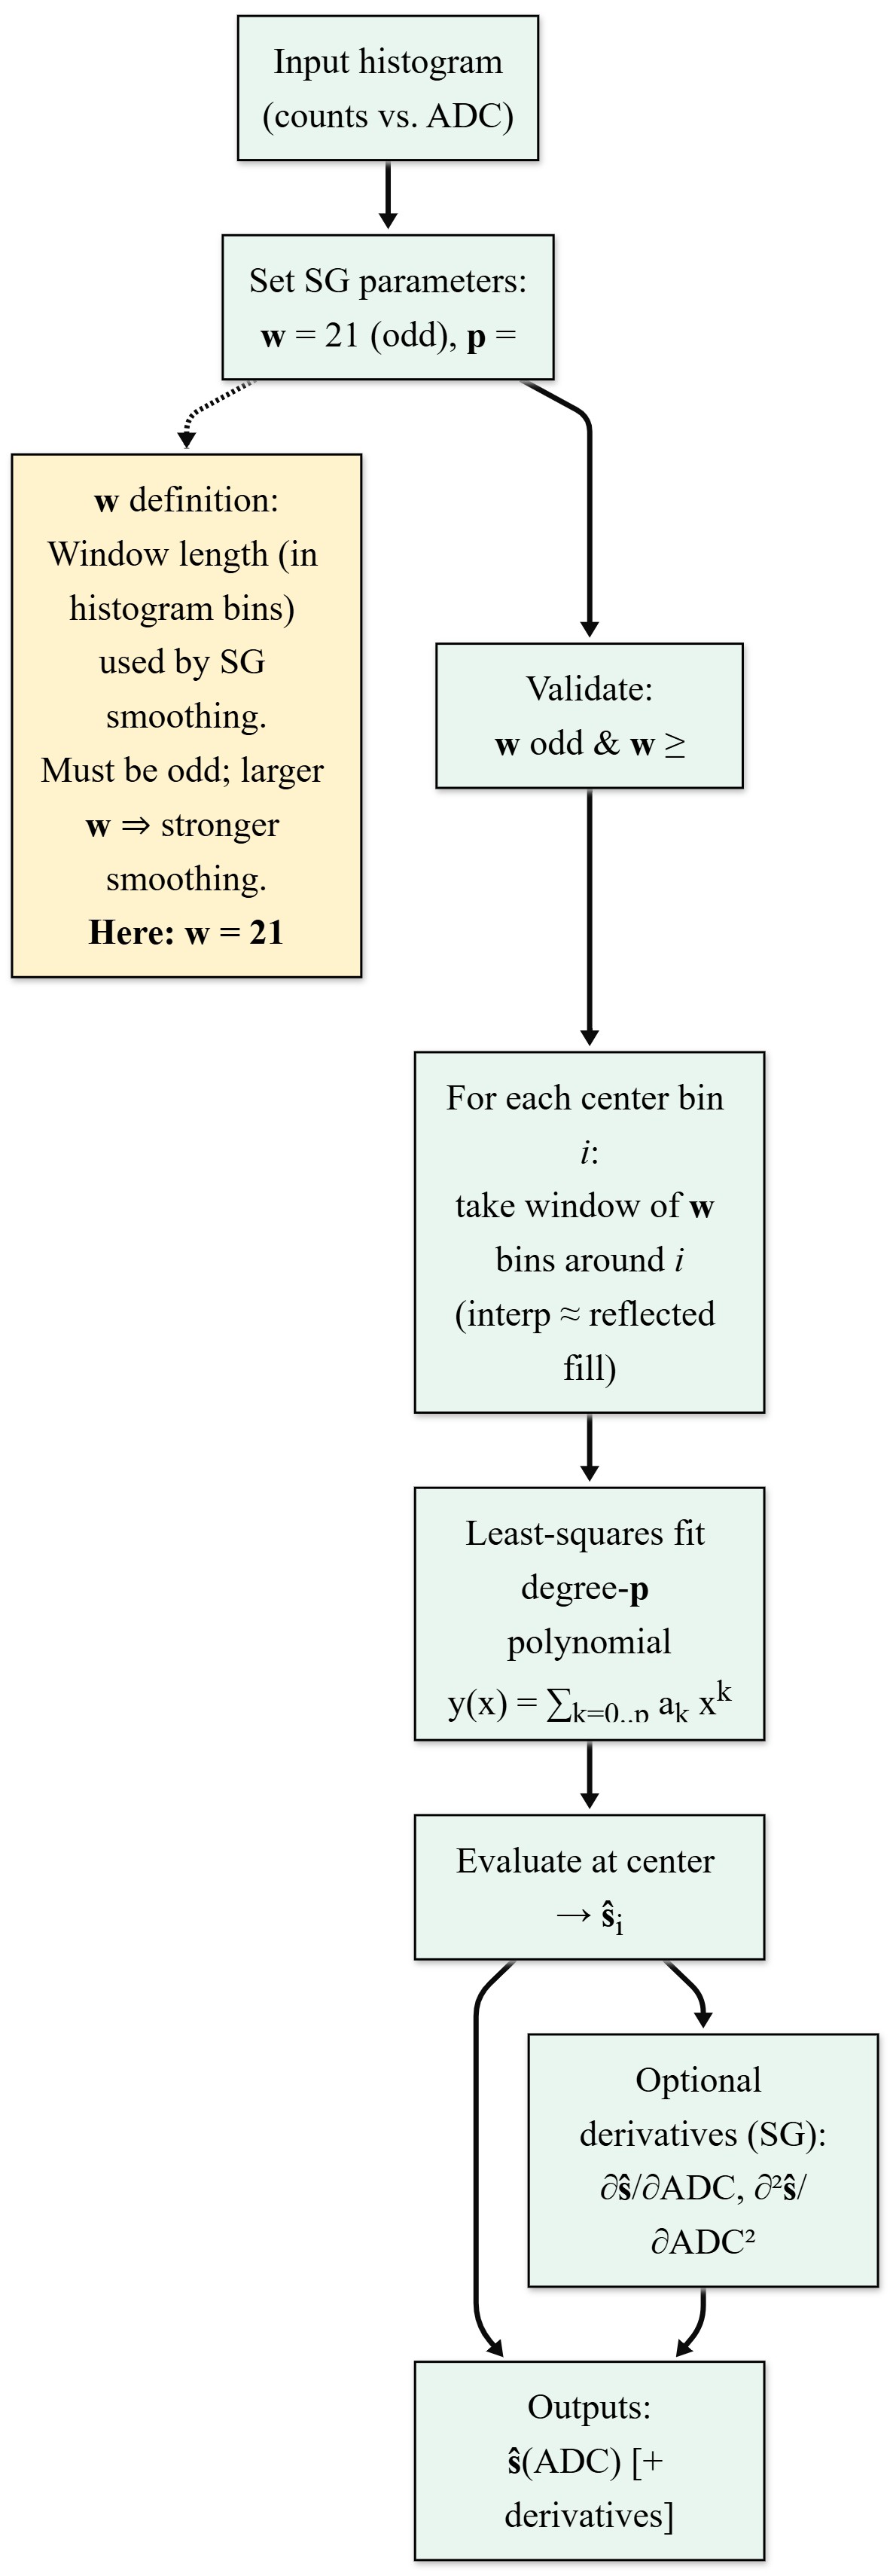


**Supplementary Figure 2 | Savitzky–Golay smoothing used in the valley-finding algorithm.** The smoothing is applied with parameters (odd), , and mode = *interp*. The window width satisfies the stability and validity conditions and .


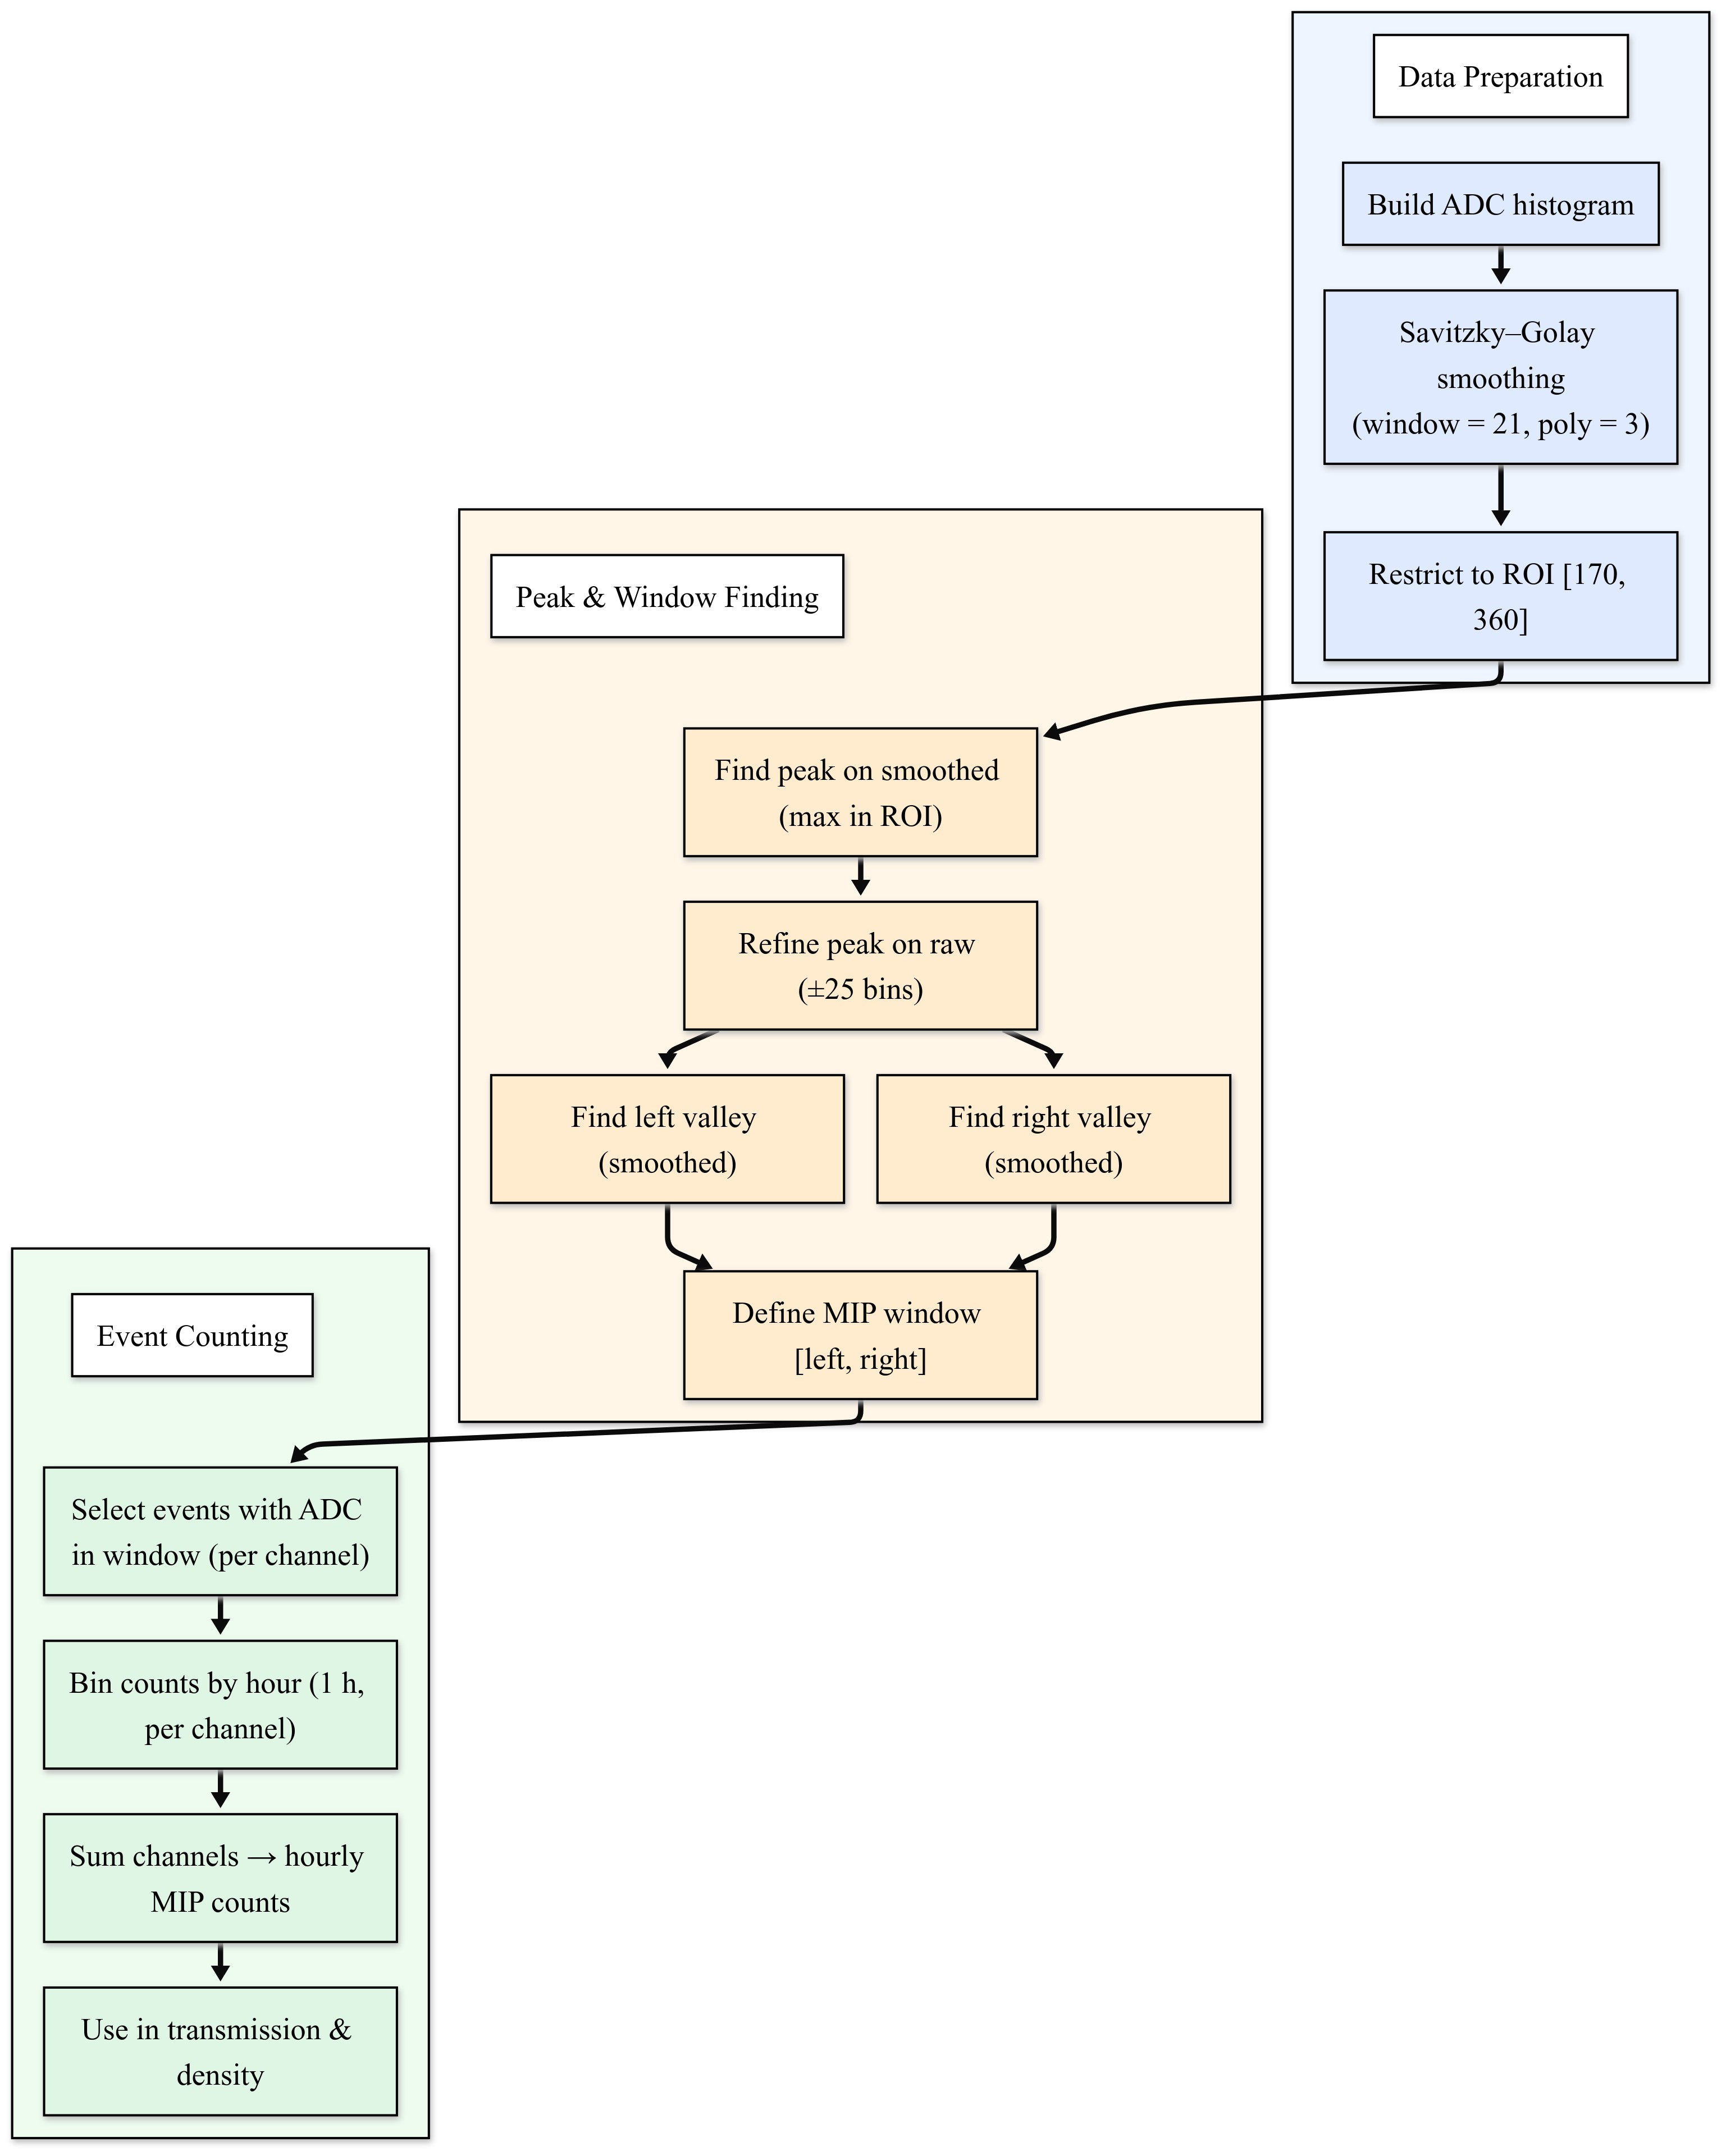


**Supplementary Figure 3 | Automated MIP valley–selection workflow.** The procedure identifies the MIP region by locating the peak on the Savitzky–Golay–smoothed spectrum, defining boundaries using the right-hand fractional rule on the same curve, and performing event counting in the corresponding raw pulse-height space.


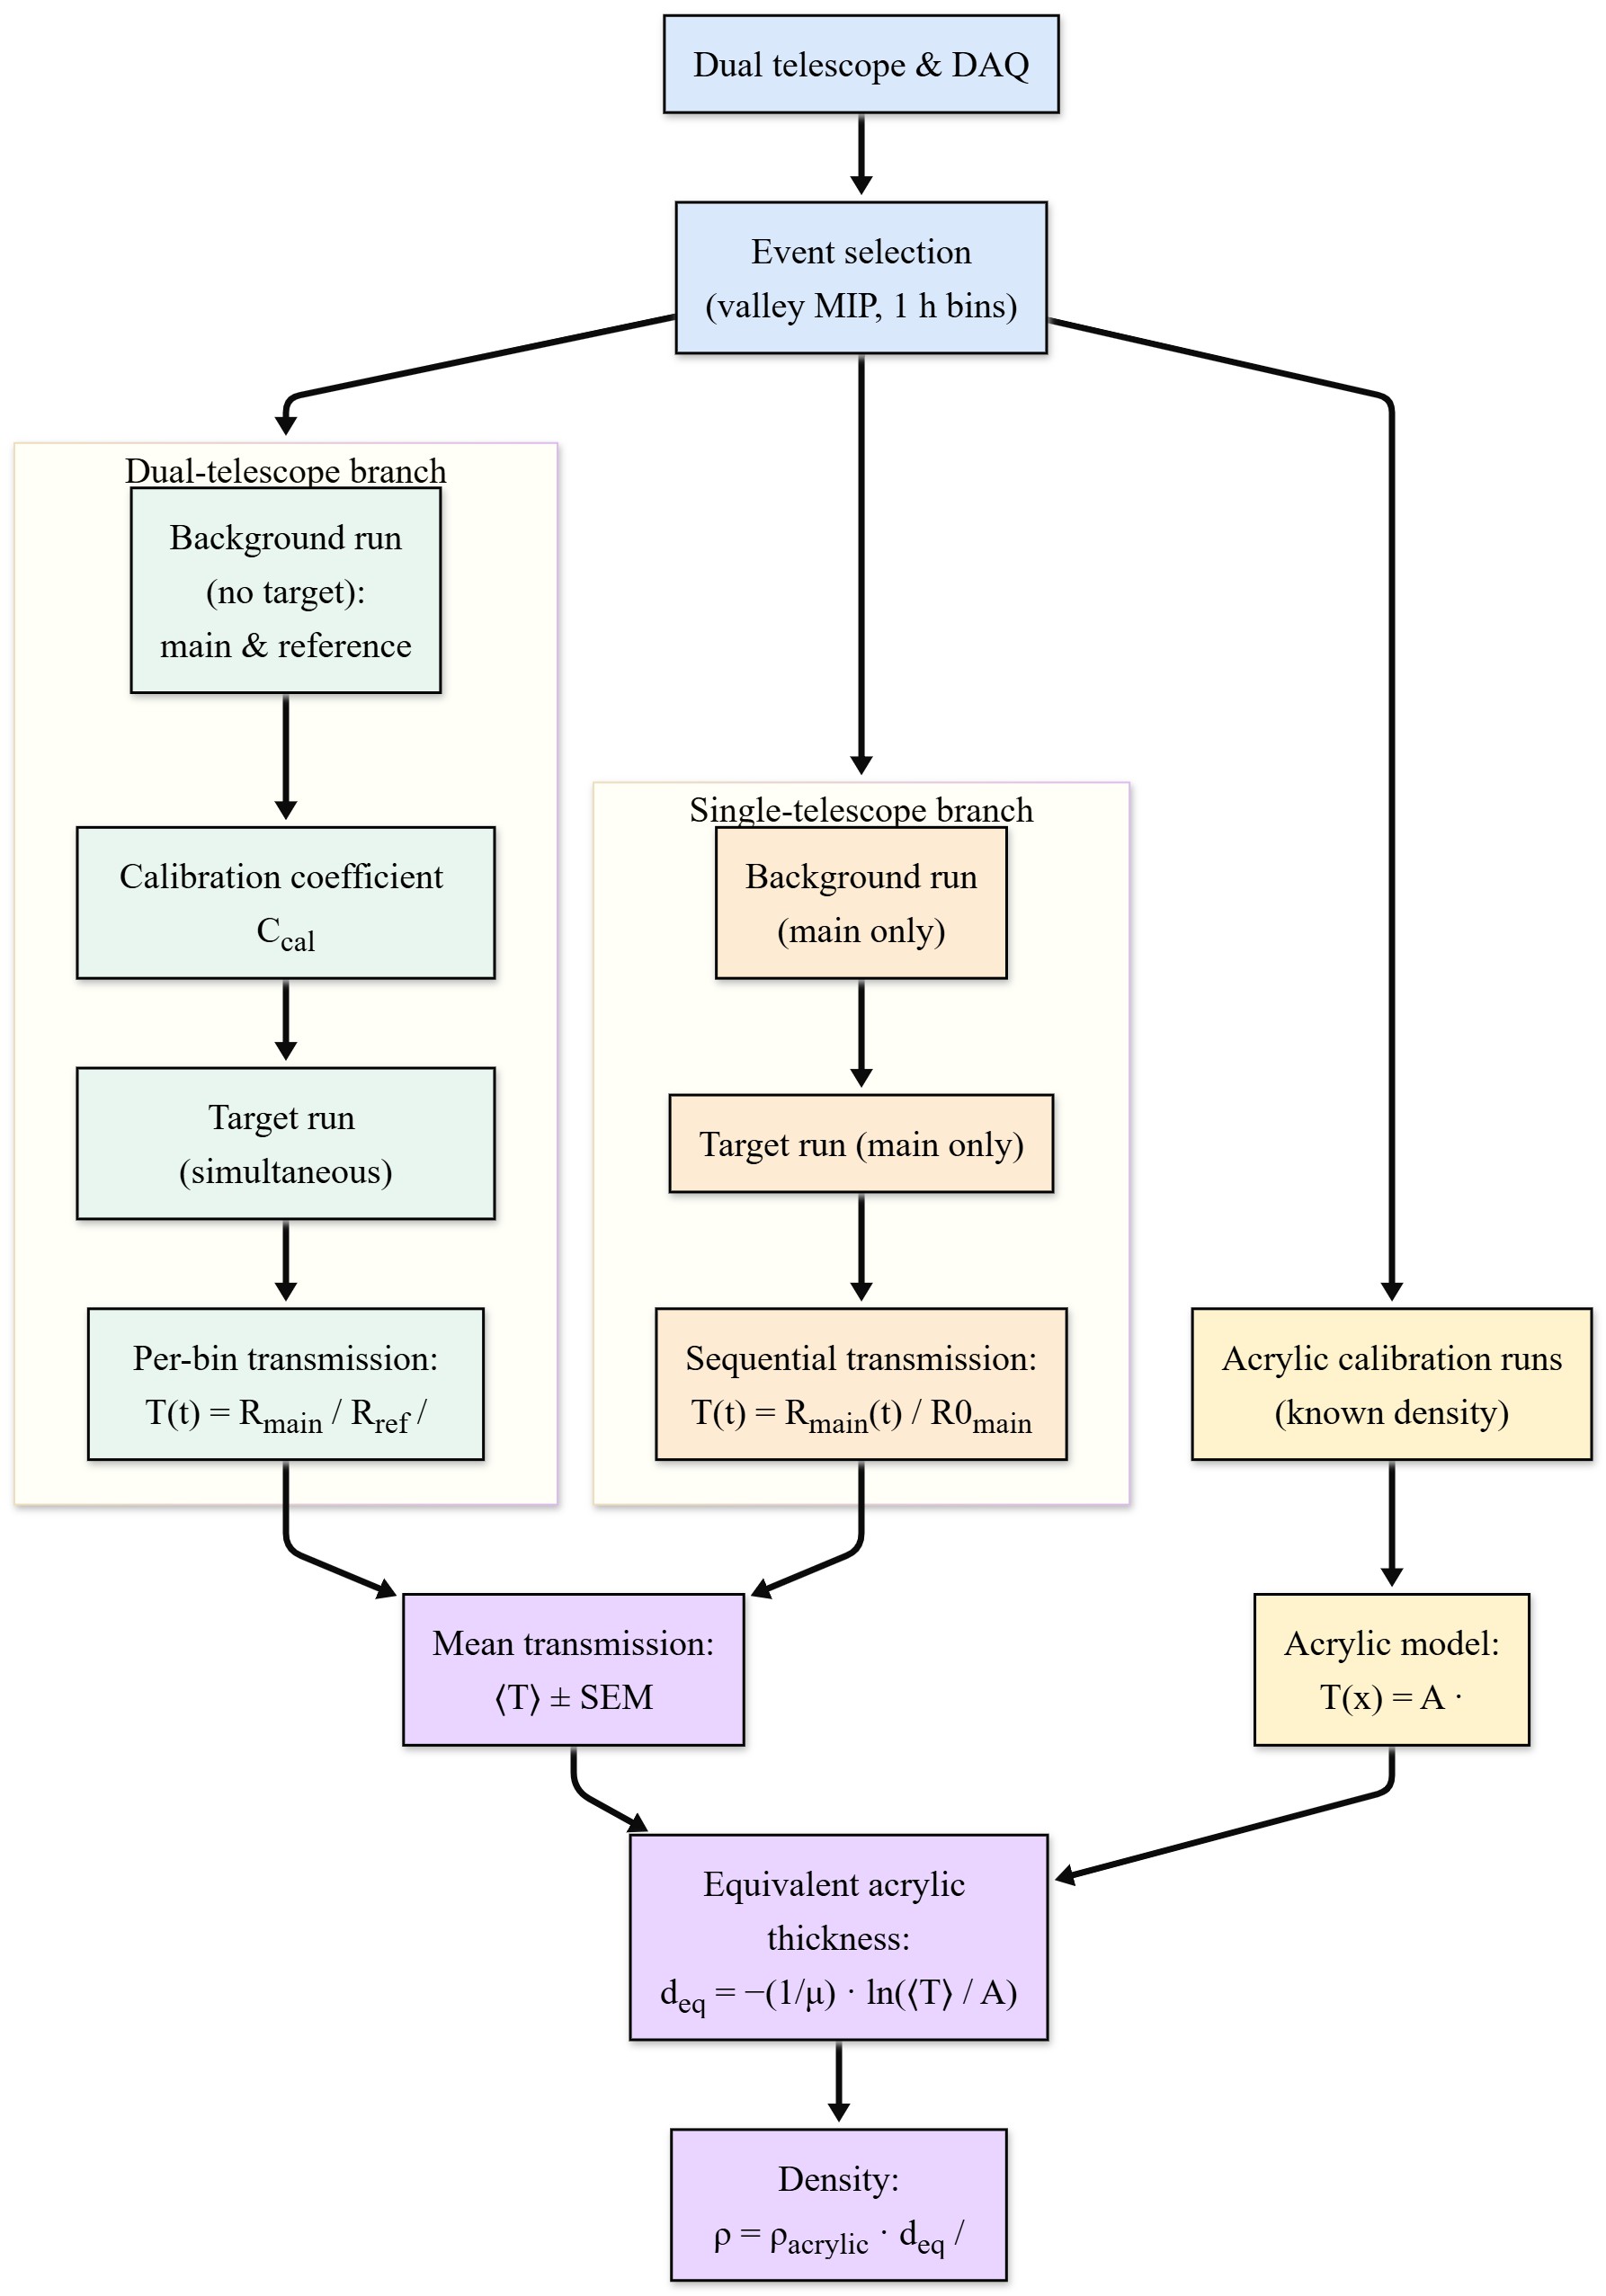


**Supplementary Figure 4 | Workflow for density estimation.** The Dual-telescope approach (green) employs simultaneous main and reference count rates normalized by a calibration factor, while the Single-telescope approach (orange) relies on sequential main-only measurements referenced to a baseline. The acrylic calibration (yellow) converts mean transmission values into equivalent acrylic thickness and corresponding material density.
